# Supplementary material for: Supramolecular chiral sensing by supramolecular helical polymers
Source: Royal Society of Chemistry journal article supplement (doi:10.1039/d2cc06502a), 2023-01-01
Supplement: d2cc06502a1.pdf [file d2cc06502a1.pdf]

Supporting Information For:

## **Supramolecular Chiral Sensing by Supramolecular Helical Polymers**

Takehiro Hirao<sup>1,†</sup>, Sei Kishino<sup>1,†</sup>, and Takeharu Haino<sup>1,2,\*</sup>

<sup>1</sup>Department of Chemistry, Graduate School of Advanced Science and Engineering, Hiroshima University, 1-3-1 Kagamiyama, Higashi-Hiroshima, Hiroshima, 739-8526, JAPAN.

<sup>2</sup>International Institute for Sustainability with Knotted Chiral Meta Matter (SKCM<sup>2</sup>), Hiroshima University, 1-3-1 Kagamiyama, Higashi-Hiroshima, Hiroshima, 739-8526, JAPAN.

To whom correspondence should be addressed: \*E-mail: [haino@hiroshima-u.ac.jp](mailto:haino@hiroshima-u.ac.jp)

<sup>†</sup>These two authors contributed equally.

## Contents

|                                                                                                                                              |       |
|----------------------------------------------------------------------------------------------------------------------------------------------|-------|
| <b>General</b> .....                                                                                                                         | S2    |
| <b>Method</b> .....                                                                                                                          | S3    |
| <b>Scheme S1</b> Synthesis of <b>2</b> .....                                                                                                 | S4    |
| <b>Figure S1</b> <sup>1</sup> H and <sup>13</sup> C NMR spectra of <b>2</b> .....                                                            | S5    |
| <b>Figure S2–S4</b> 2D NMR spectra of <b>2</b> .....                                                                                         | S6–S8 |
| <b>Figure S5</b> . Plot of <sup>1</sup> H NMR signal intensities obtained from the diffusion experiments for <b>2</b> .....                  | S9    |
| <b>Figure S6</b> . HRMS spectrum of <b>2</b> .....                                                                                           | S10   |
| <b>Figure S7</b> . UV/vis spectra of <b>2</b> .....                                                                                          | S10   |
| <b>Figure S8</b> . AFM image of <b>2</b> .....                                                                                               | S11   |
| <b>Figure S9</b> . VT ECD spectra of <b>2</b> .....                                                                                          | S11   |
| <b>Figure S10</b> . ECD spectra of <b>2</b> in the mixture of (+)- and (–)- $\alpha$ -pinene with various ee values.....                     | S12   |
| <b>Figure S11</b> . Plot of $\Delta\epsilon$ values of <b>2</b> in the mixture of (+)- and (–)- $\alpha$ -pinene with various ee values..... | S13   |
| <b>References</b> .....                                                                                                                      | S14   |

### General

All solvents were commercial reagent grade and were used without further purification except where noted. Dry 1,2-dichloroethane and dry NEt<sub>3</sub> was obtained by distillation over CaH<sub>2</sub> and KOH, respectively. <sup>1</sup>H, <sup>13</sup>C, and 2D NMR (DQF-COSY, NOESY, and HSQC) spectra were recorded on a JEOL ECA-600 spectrometer, and chemical shifts were reported on the delta scale in ppm relative to residual pyridine ( $\delta = 8.74$  and 150.4 for <sup>1</sup>H and <sup>13</sup>C, respectively). Diffusion-ordered <sup>1</sup>H NMR spectroscopic (DOSY) measurement was carried out on a JEOL ECA-500 spectrometer. Melting points (M.p.) were measured with a Yanagimoto micro melting point apparatus. Infrared (IR) spectra were recorded on a JASCO FT/IR-4600 spectrometer with ZeSe ATR accessory. Preparative separations were performed by silica gel gravity column chromatography (Silica Gel 60 N (spherical, neutral)). Preparative medium pressure liquid chromatography (MPLC) separations were carried out with a YAMAZEN smart flash EPCLC AL-580S using a preparative Bio-Beads (S-X1) column. Recycling preparative GPC-HPLC separations were carried out on JAI LaboACE LC-5060 using preparative JAIGEL-2.5HH, 2HH columns in series. UV/vis absorption spectra were recorded on a JASCO V-760 spectrometer. Circular dichroism (CD) spectra were recorded on a JASCO J-1500 spectrometer. Morphological evaluation of the samples was performed using atomic force microscopy (AFM) using a Bruker Multimode 8HR under ambient conditions with a Bruker cantilever model NCHV in the tapping mode. NanoScope Analysis 2.0 was used for the AFM image analysis. **1**<sup>[1]</sup> and 2-octyldecano<sup>[2]</sup> were synthesized according to reported methods.

## Method

*Determination of an affinity constant ( $K_a$ ) corresponding to the intermolecular interactions between bis(porphyrin) moieties of **2**.*<sup>[3]</sup>

A hyperbolic curve was obtained by plotting the concentrations of **2** against the extinction coefficients ( $\epsilon$ ) ( $\lambda = 435$  nm). Curve fitting analysis was performed using Igor pro program based on an isodesmic model. The fitting functions are given by eq. S1,

$$\epsilon(C) = \frac{2K_a C + 1 - \sqrt{4K_a C + 1}}{2K_a^2 C^2} (\epsilon_1 - \epsilon_a) + \epsilon_a \quad (S1)$$

where  $C$ ,  $K_a$ ,  $\epsilon_1$ , and  $\epsilon_a$  denote the total concentration of **2**, the affinity constant, the  $\epsilon$  of the monomer, and the  $\epsilon$  of the aggregate species, respectively.

*Determination of diffusion coefficient ( $D$ ) of the molecular species in the solution of **2**.*<sup>[4]</sup>

Chloroform- $d$  solutions of **2** were placed in an NMR sample tube (3 mm $\Phi$ ). The pulse-field gradient diffusion NMR spectra were recorded using a bipolar pulse pair stimulated echo pulse sequence on a JEOL JNM-ECA500 spectrometer with a three mm inverse H3X/FG probe at 24 °C. The resulting DOSY data were analyzed using a MestReNova program to obtain the diffusion coefficient values ( $D$ ) shown in Fig. 2b. The signal decay of the selected protons was fit to fitting functions given by eq. S2 (Fig. S5), where  $I$  and  $I_0$  denote the NMR signal intensities in the presence and absence of gradient pulses, respectively.  $D$  is the diffusion coefficient value.

$$I = I_0 e^{-xD} \quad (S2)$$

The  $x$  denotes  $[-\gamma^2 g^2 \delta^2 (\Delta - \delta/3)]$ , where  $\gamma$ ,  $g$ ,  $\delta$ , and  $\Delta$  indicate the gyromagnetic ratio, gradient strength, its duration, and separation between the edges of the gradient pulses, respectively.

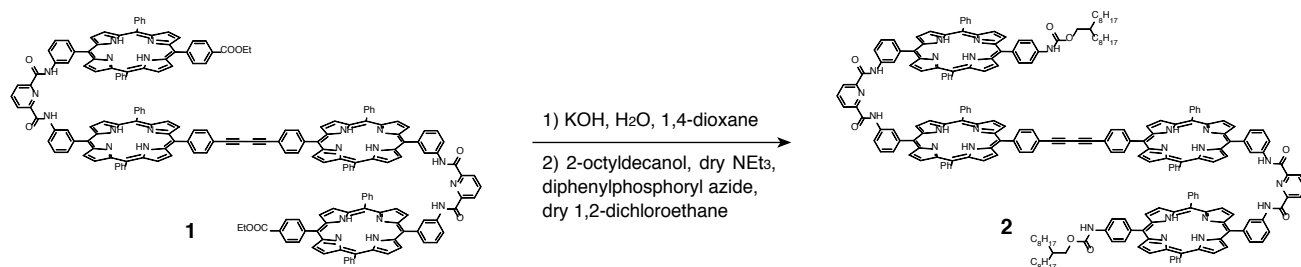

**Scheme S1.** Synthesis of **2**.

**bis(porphyrin) dimer 2:** To a solution of **1** (61.2 mg, 20.6  $\mu\text{mol}$ ) in 1,4-dioxane (9.8 mL) and water (0.82 mL) was added potassium hydroxide (23.0 mg, 410  $\mu\text{mol}$ ). The mixture was stirred for 2 h at 100  $^{\circ}\text{C}$  under a nitrogen atmosphere. The reaction mixture was acidified with 1M hydrochloric acid to pH 4. After concentrating the organic layer to 1/2 of its original volume, the resulting precipitate was filtered off, washed with water and MeOH, and dried over under the reduced pressure. The resulting solid was dissolved in dry 1,2-dichloroethane (2.7 mL) in a pressure tube, and dry triethylamine (50  $\mu\text{L}$ ), diphenylphosphoryl azide (11.5 mg, 41.8  $\mu\text{mol}$ ), and 2-octyldecanol (159 mg, 588  $\mu\text{mol}$ ) were added at room temperature. The mixture was stirred for 20 h at 90  $^{\circ}\text{C}$  under a nitrogen atmosphere and diluted with  $\text{CHCl}_3$ . The organic layer was washed with aqueous  $\text{NaHCO}_3$ , dried over  $\text{Na}_2\text{SO}_4$ , and concentrated under the reduced pressure. MPLC (chloroform, eluent), subsequent silica-gel column chromatography (4% MeCN in toluene, eluent), and GPC gave the desired product **2** (25.0 mg, 35%, for 2 steps) as a purple solid.

M.p.: > 300  $^{\circ}\text{C}$ .  $^1\text{H}$  NMR (pyridine- $d_5$ , 600 MHz):  $\delta$  11.39 (s, 2H), 11.27 (s, 4H), 9.25 (d, 4H,  $J = 5.0$  Hz), 9.13 (d, 4H,  $J = 4.8$  Hz), 9.11 (d, 4H,  $J = 4.8$  Hz), 9.08 (d, 4H,  $J = 5.0$  Hz), 8.98 (m, 8H), 8.87 (m, 8H), 8.52 (overlapped, 4H), 8.49 (overlapped, 8H), 8.43 (overlapped, 4H), 8.32 (overlapped, 10H), 8.16 (overlapped, 12H), 8.03 (m, 4H), 7.69–7.81 (overlapped, 16H), 7.63 (m, 4H), 7.55 (m, 8H), 4.52 (d, 4H,  $J = 6.3$  Hz), 1.90 (m, 2H), 1.22–1.57 (m, 56H), 0.90 (t, 12H,  $J = 6.5$  Hz), -2.51 (s, 4H), -2.55 (s, 4H).  $^{13}\text{C}\{^1\text{H}\}$  NMR (chloroform- $d_1$ , 100 MHz):  $\delta$  163.3, 163.2, 155.8, 144.5, 143.3, 143.2, 142.9, 142.8, 141.3, 139.5, 137.9, 137.8, 136.9, 135.4, 135.3, 132.1, 131.7, 128.7, 128.7, 128.3, 127.9, 127.7, 126.1, 122.1, 121.7, 121.5, 121.4, 121.1, 121.0, 120.5, 120.0, 118.0, 83.6, 76.6, 68.3, 38.8, 32.7, 32.2, 30.9, 30.4, 30.1, 27.7, 23.5, 14.8. HRMS (ESI $^+$ ) calcd. for  $\text{C}_{232}\text{H}_{201}\text{O}_8\text{N}_{24}$   $m/z$  1150.2014 [ $\text{M}+3\text{H}$ ] $^{3+}$ , found  $m/z$  1150.2024.

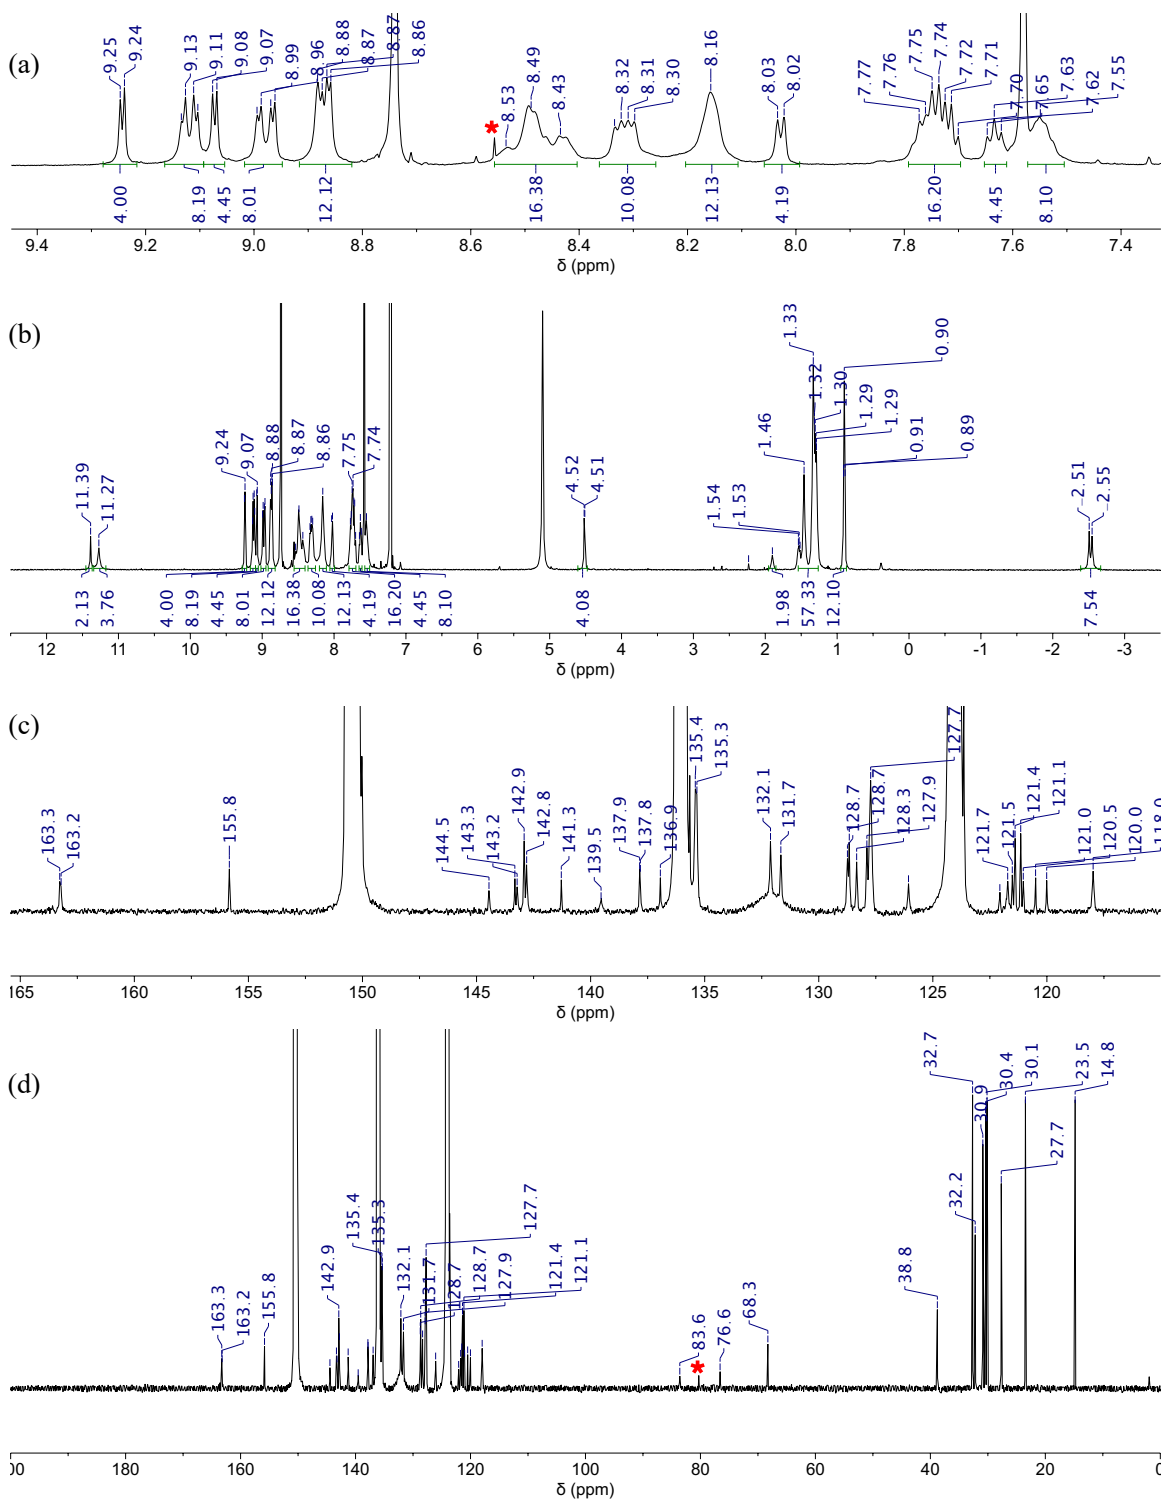

**Figure S1.**  $^1\text{H}$  (600 MHz) and  $^{13}\text{C}\{^1\text{H}\}$  (150 MHz) spectra of **2** in  $\text{pyridine-}d_5$ . The expanded views of the spectra and the full spectra are shown in panels (a), (c) and (b), (d), respectively. Asterisk (\*) denotes residual chloroform.

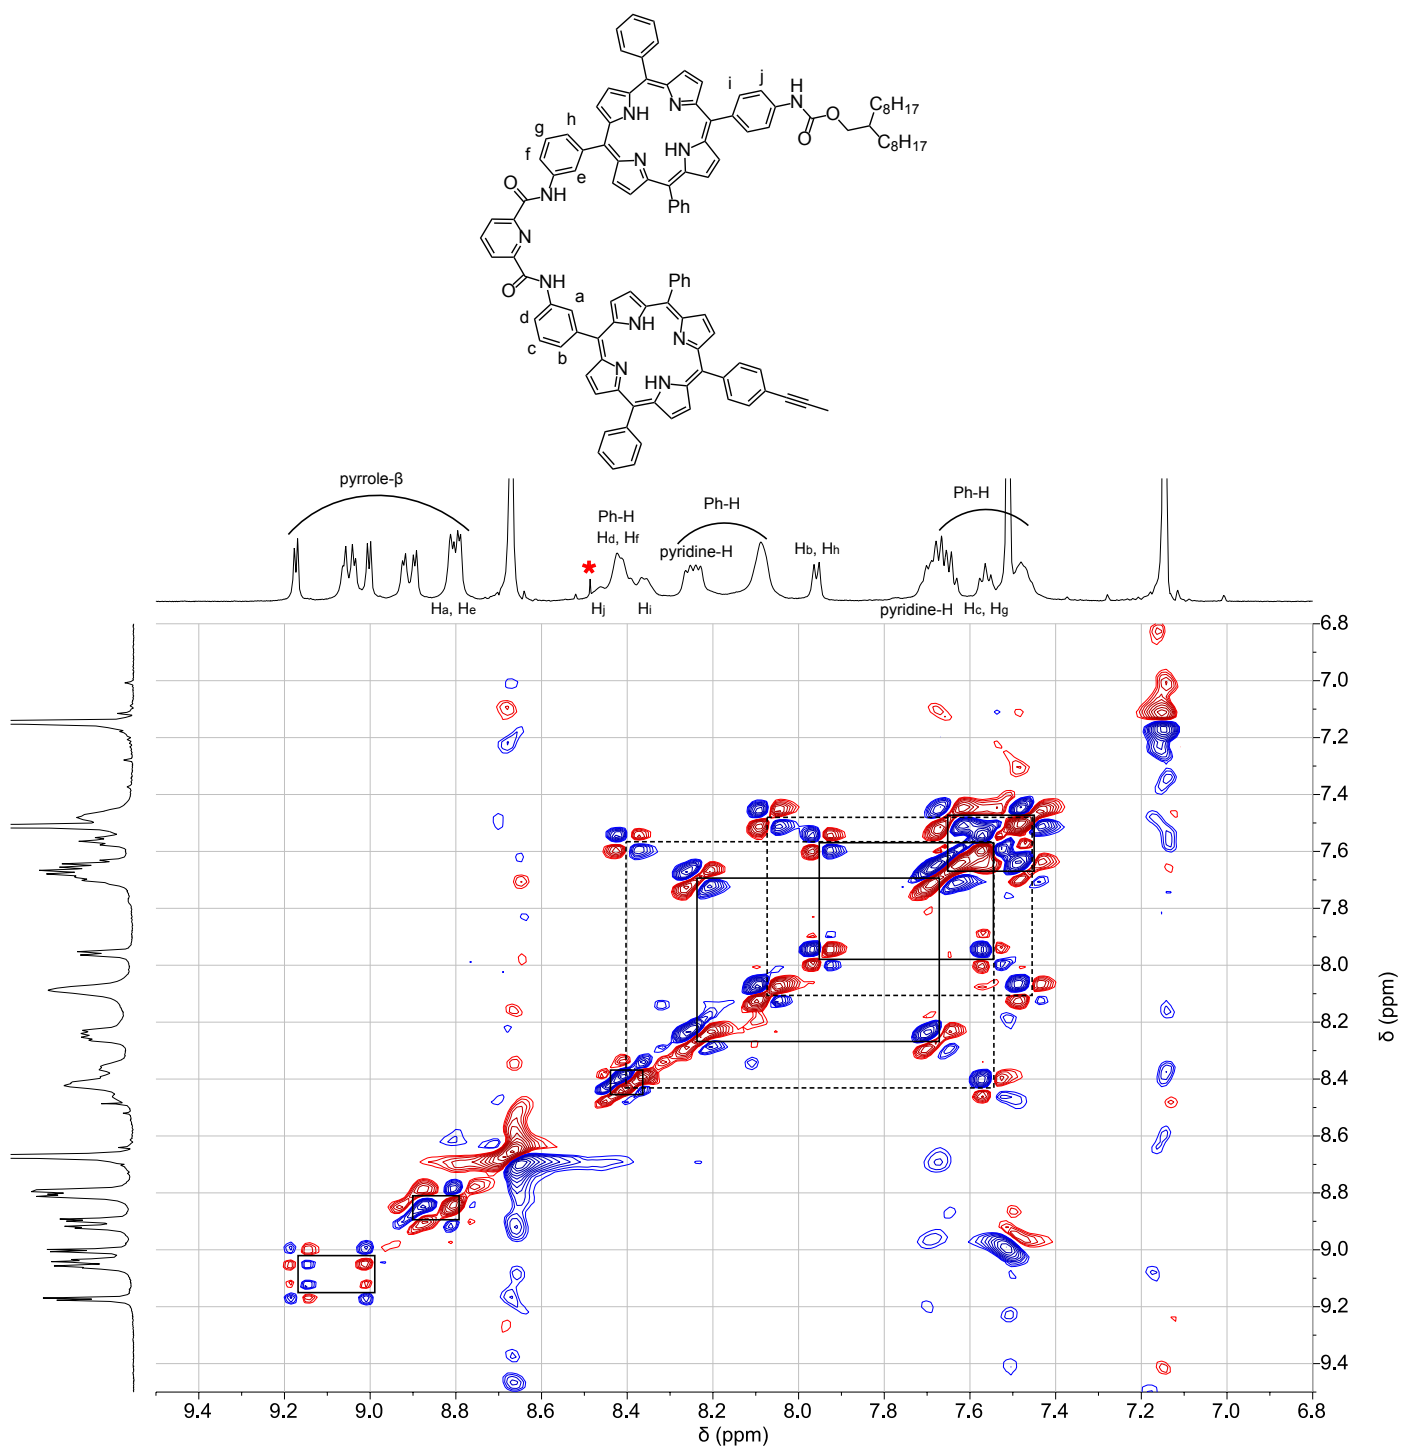

**Figure S2.** DQF-COSY spectrum of **2** in pyridine-*d*<sub>5</sub>. Asterisk (\*) denotes residual chloroform.

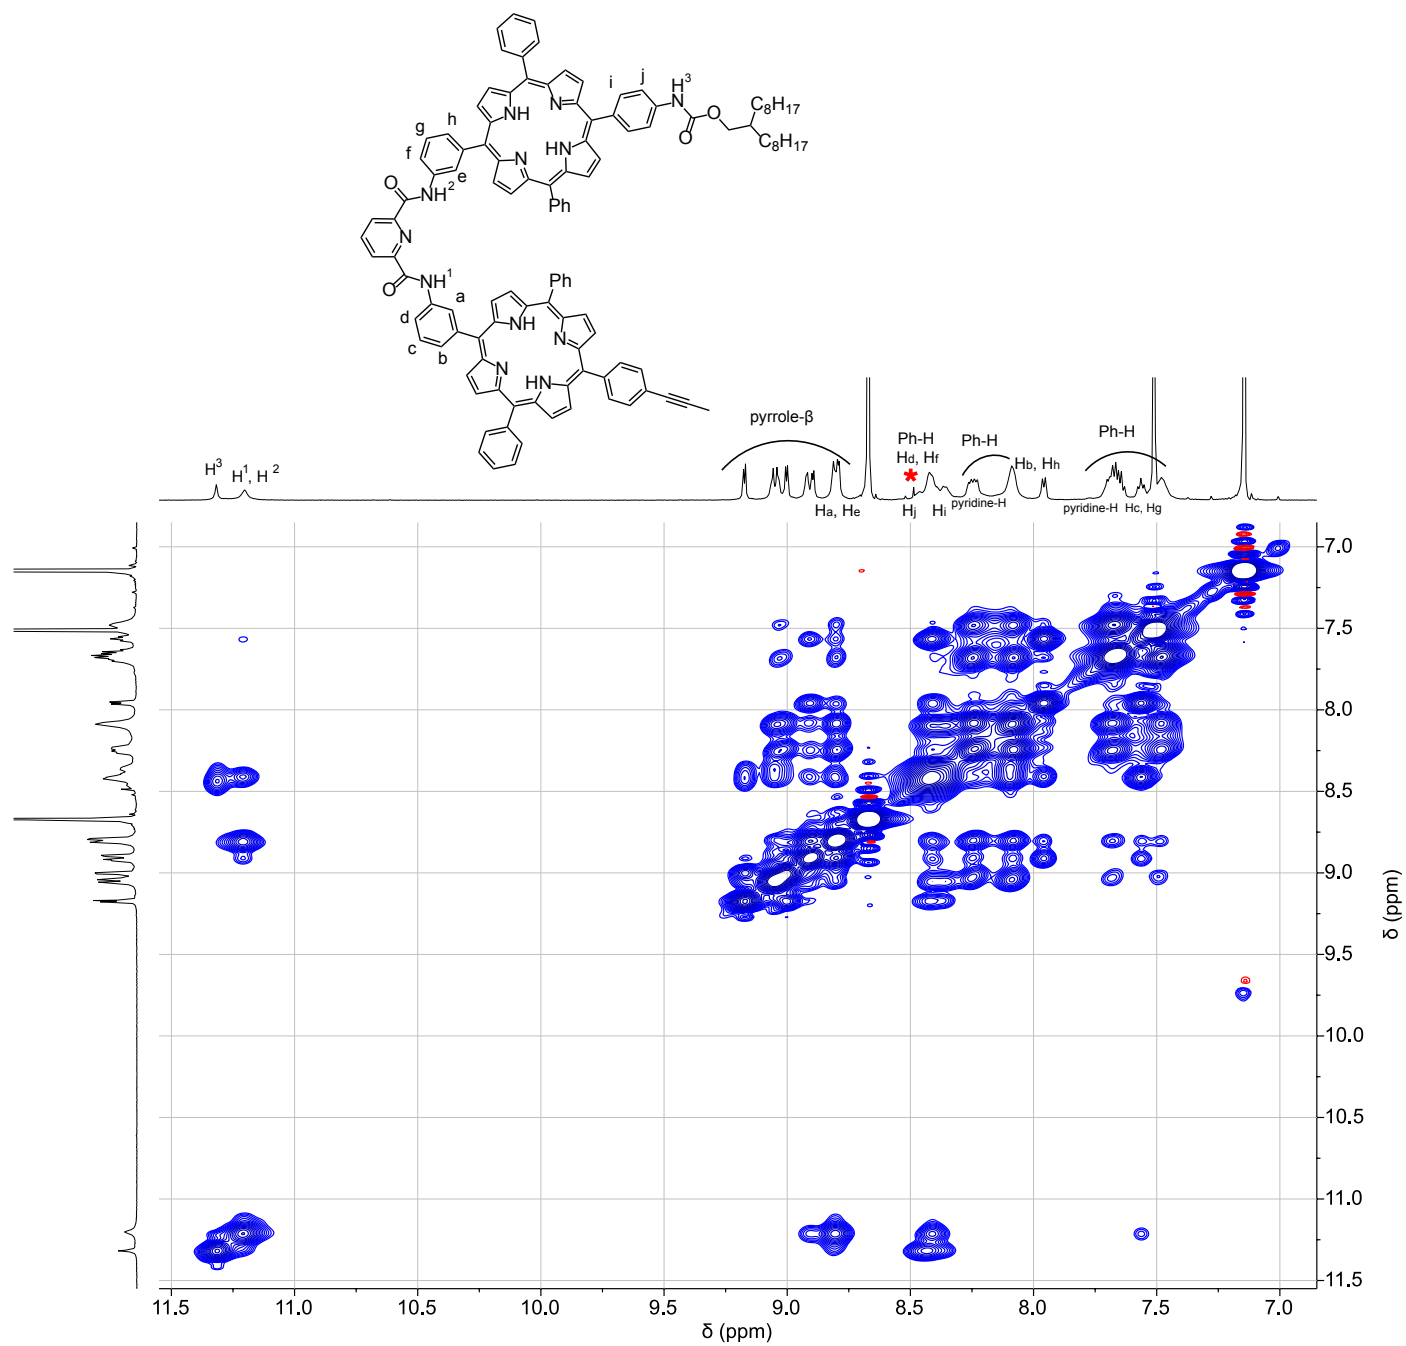

**Figure S3.** NOESY spectrum of **2** in pyridine- $d_5$ . Asterisk (\*) denotes residual chloroform.

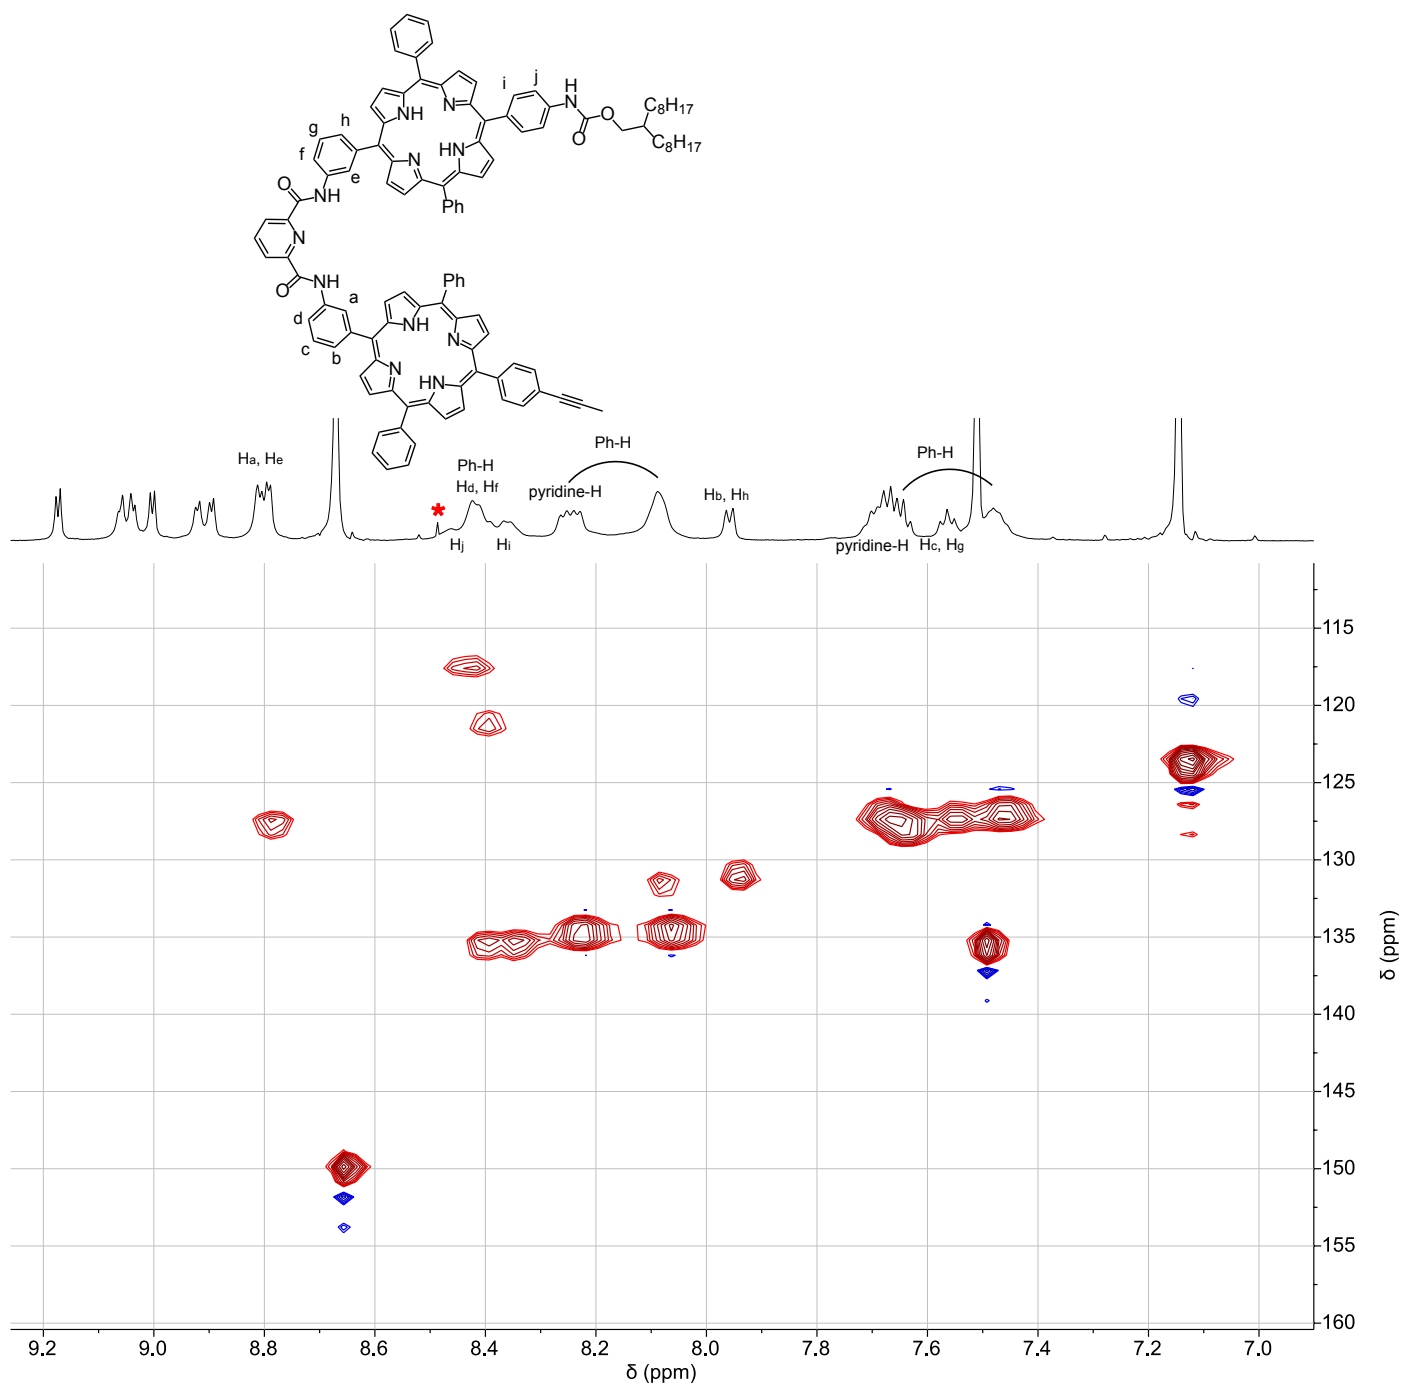

**Figure S4.** HSQC spectrum of **2** in pyridine- $d_5$ . CH<sub>3</sub> and CH carbons are phased up (red), and CH<sub>2</sub> carbons are phased down (blue). Asterisk (\*) denotes residual chloroform.



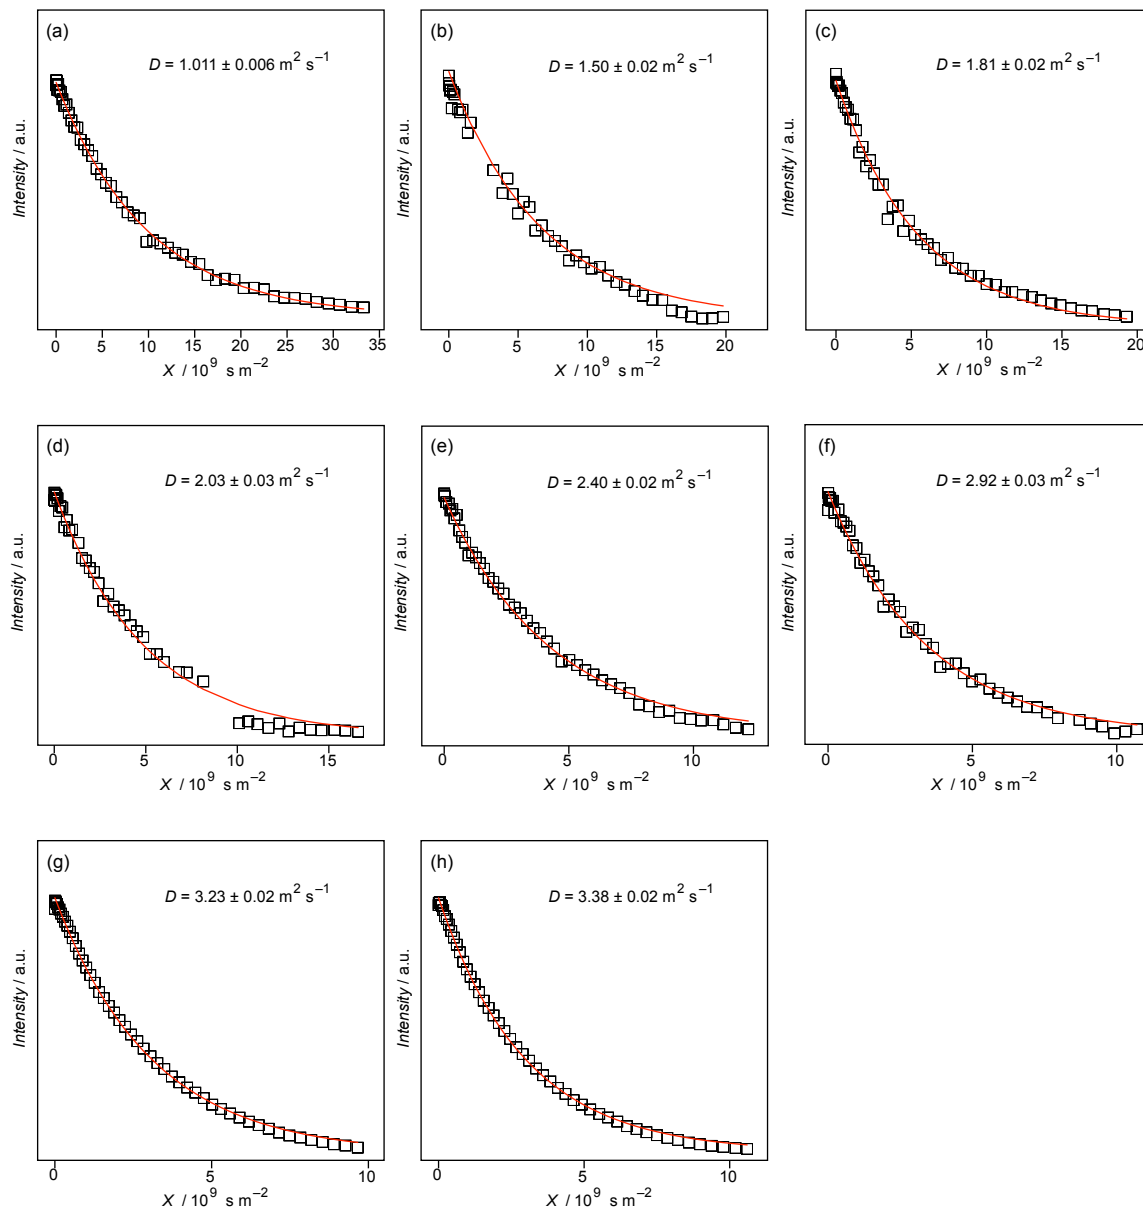

**Figure S5.** Plot of  $^1\text{H}$  NMR signal intensities obtained from the diffusion experiments for **2** in chloroform-*d* at the concentrations of (a) 30, (b) 20, (c) 15, (d) 10, (e) 8.0, (f) 5.0, (g) 2.0, and (h) 1.0  $\text{mmol L}^{-1}$  and their fitting curves (red lines).

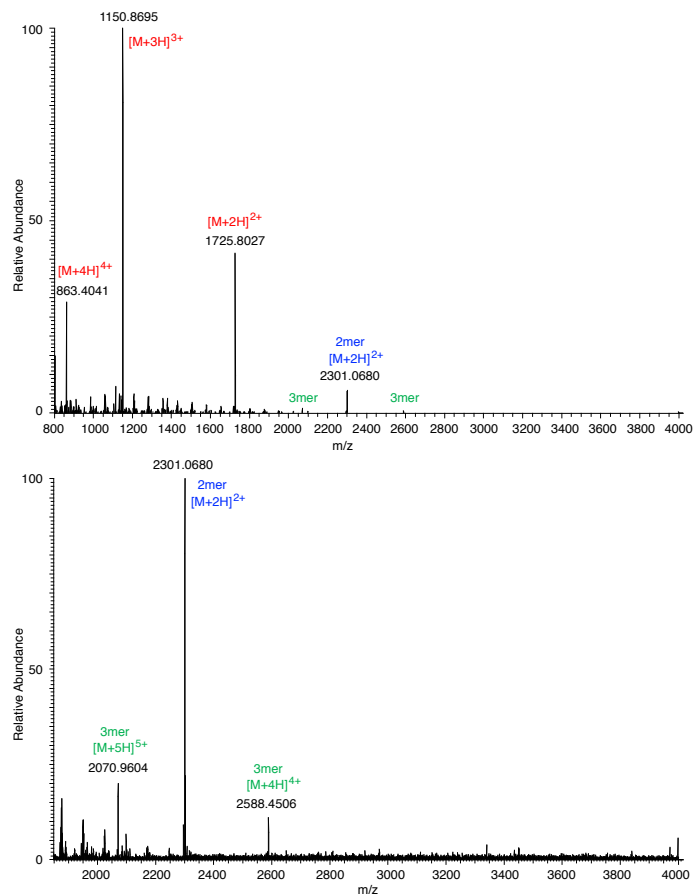

**Figure S6.** HRMS (ESI<sup>+</sup>) spectrum of **2** (top panel) and its expanded view (bottom panel).

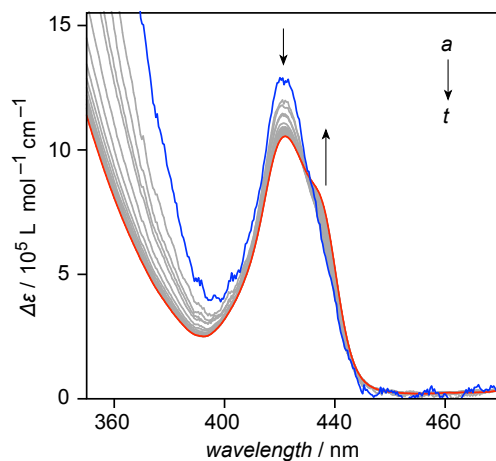

**Figure S7.** UV/vis spectral absorption changes seen for **2** in (+)-limonene at 90 °C. The concentrations are (a-t) 0.51, 1.0, 1.5, 2.0, 2.5, 3.5, 4.4, 5.3, 6.3, 7.2, 8.0, 8.9, 9.7, 10.6, 11.4, 12.2, 13.0, 14.0, 15.0, 15.8 × 10<sup>-8</sup> mol L<sup>-1</sup>. The blue and red lines indicate spectra of **2** at the concentrations of 0.51 × 10<sup>-8</sup> mol L<sup>-1</sup> and 15.8 × 10<sup>-8</sup> mol L<sup>-1</sup>, respectively.

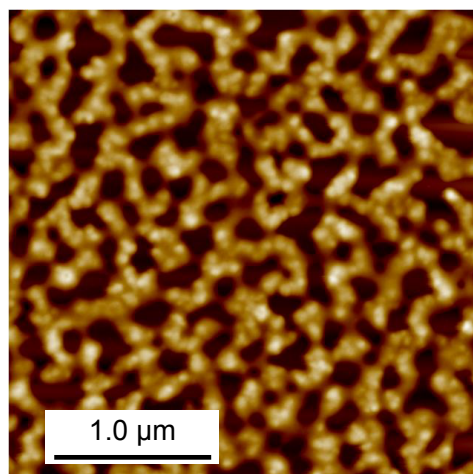

**Figure S8.** AFM image of the cast films of **2** on mica prepared from its (+)-limonene solution.

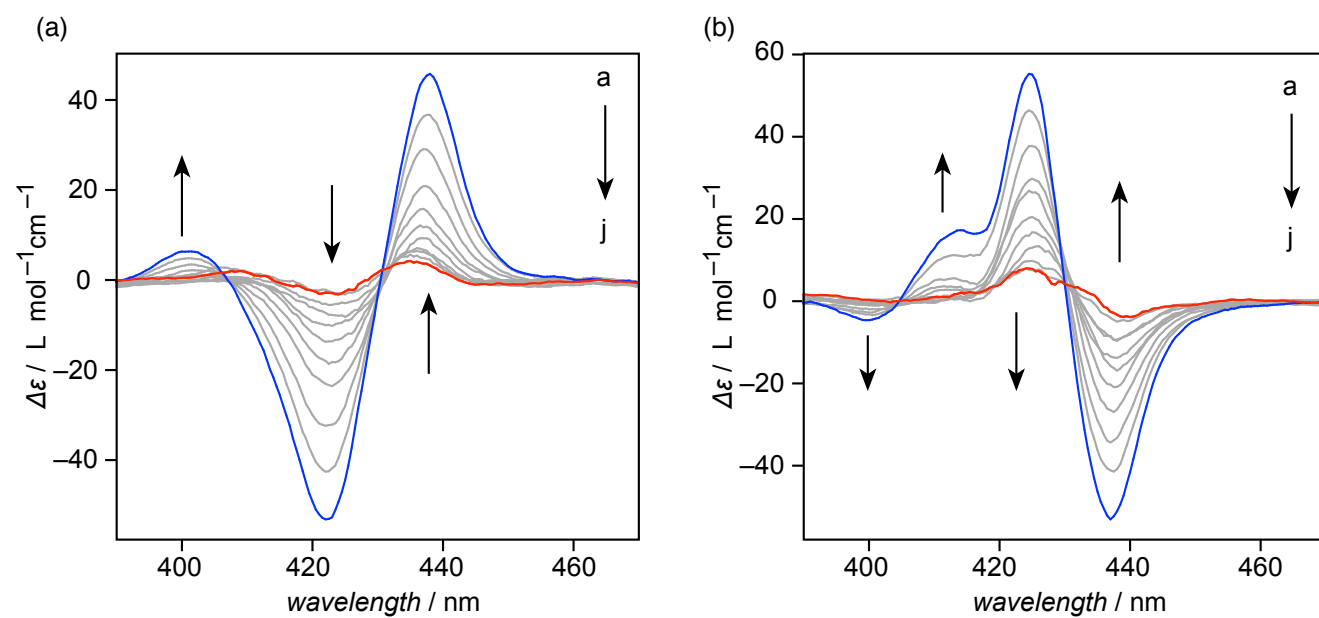

**Figure S9.** Valuable temperature ECD spectra of **2** ( $2.5 \times 10^{-5} \text{ mol L}^{-1}$ ) in (a) (-)- $\alpha$ -pinene and (b) (-)- $\beta$ -pinene. The temperatures are (a-j) 100, 90, 80, 70, 60, 50, 40, 30, 20, 10, 0 °C. The red and blue lines denote the spectra observed at 100 °C and 0 °C, respectively.

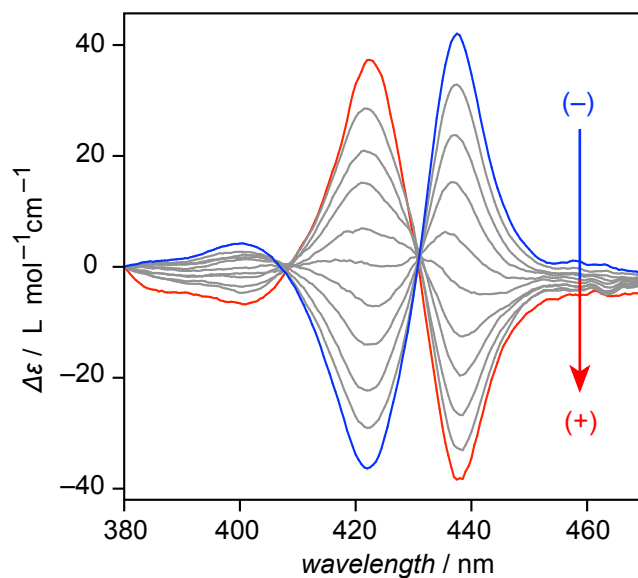

**Figure S10.** ECD spectra of **2** ( $2.5 \times 10^{-5} \text{ mol L}^{-1}$ ) in the mixture of (+)- and (-)- $\alpha$ -pinene with various ee values. The ee values are 100, 90, 80, 70, 60, 50, 40, 30, 20, 10, 0, -10, -20, -30, -40, -50, -60, -70, -80, -90, -100%, where  $ee = \frac{[(+)\text{-}\alpha\text{-pinene}] - [(-)\text{-}\alpha\text{-pinene}]}{[(+)\text{-}\alpha\text{-pinene}] + [(-)\text{-}\alpha\text{-pinene}]}$ .

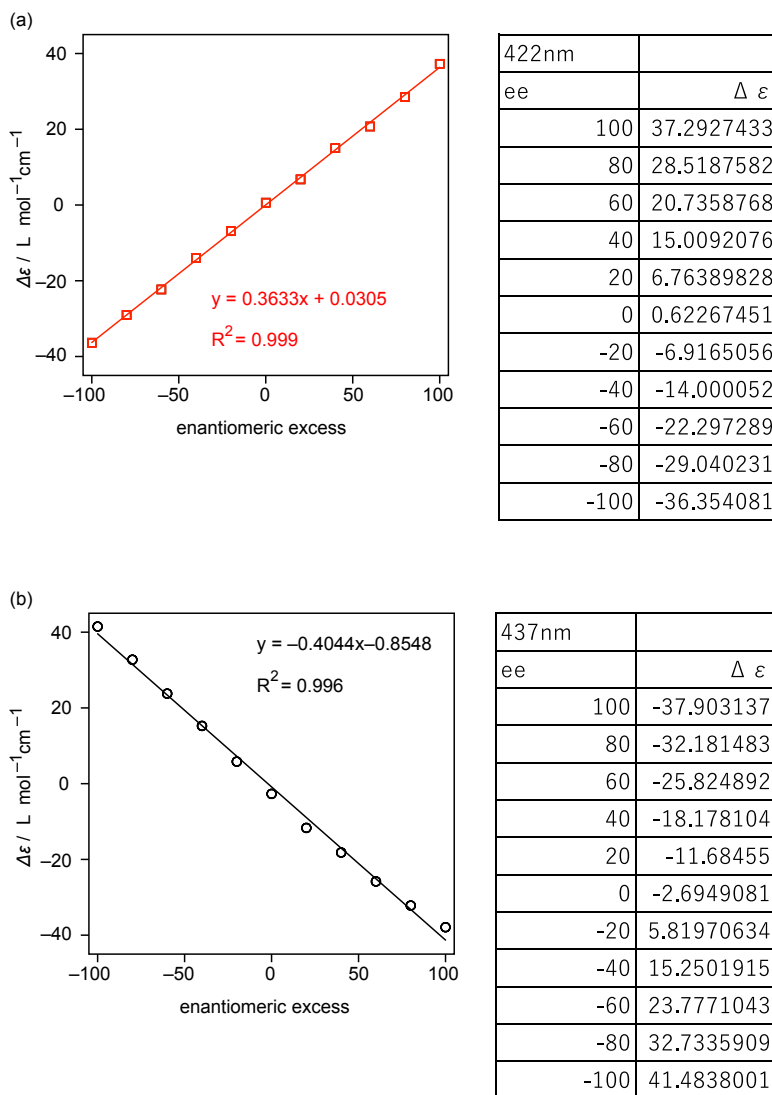

**Figure S11.**  $\Delta\epsilon$  values of **2** ( $2.5 \times 10^{-5}$  mol L<sup>-1</sup>) in the mixture of (+)- and (-)- $\alpha$ -pinene with various ee values and the linear regression lines for the ee vs  $\Delta\epsilon$  values observed at (a) 422 nm and (b) 437 nm. The x and y indicate ee and  $\Delta\epsilon$  values, respectively. Enantiomeric excess (ee) =  $\{[(+)\text{-}\alpha\text{-pinene}] - [(-)\text{-}\alpha\text{-pinene}]\} / \{[(+)\text{-}\alpha\text{-pinene}] + [(-)\text{-}\alpha\text{-pinene}]\}$ .

## References

- [1] (a) T. Haino, T. Fujii, A. Watanabe, U. Takayanagi, *Proc. Natl. Acad. Sci., USA*, **2009**, *106*, 10477-10481. (b) N. Hisano, T. Hirao, K. Tanabe, T. Haino, *J. Porphyr. Phthalocyanines*, **2022**, *26*, 683-689.
- [2] M. Prehm, C. Enders, X. Mang, X. Zeng, F. Kiu, G. Ungar, U. Baumeister, C. Tschierske, *Chem. Eur. J.*, **2018**, *24*, 16072-16084.
- [3] R. B. Martin, *Chem. Rev.*, **1996**, *96*, 3043-3064.
- [4] L. Escobar, Y.-S. Li, Y. Cohen, Y. Yu, J. Rebek Jr., P. Ballester, *Chem. Eur. J.*, **2020**, *26*, 8220-8225.
